# Supplementary material for: Low temperature modified sludge-derived carbon catalysts for efficient catalytic wet peroxide oxidation of m-cresol
Source: Royal Society of Chemistry journal article supplement (doi:10.1039/c6gc03001g), 2017-01-01
Supplement: c6gc03001g1.pdf [file c6gc03001g1.pdf]

*Supplementary information for*

**Low-temperature Modified Sludge-derived Carbon Catalysts for  
Efficient Catalytic Wet Peroxide Oxidation of m-Cresol**

Yamin Wang <sup>a,b</sup>, Huangzhao Wei <sup>a</sup>, Ying Zhao <sup>a</sup>, Wenjing Sun <sup>a,b</sup> and Chenglin Sun <sup>a\*</sup>

<sup>a</sup> *Dalian Institute of Chemical Physics, Chinese Academy of Sciences, Dalian 116023, P.R. China*

<sup>b</sup> *University of Chinese Academy of Sciences, Beijing 100049, P.R. China*

\*Corresponding Author Phone: +86 411 84379326, Fax: +86 411 84699965, and

Email: [clsun@dicp.ac.cn](mailto:clsun@dicp.ac.cn)

**Summary:** This file contains 2 pages, including 2 tables and 1 figure.

## S1. Mössbauer parameters and spectra of SCs

Table S1 Mössbauer parameters of SCs.

| Sample | Component | IS (mm·s <sup>-1</sup> ) | QS (mm·s <sup>-1</sup> ) | LW (mm·s <sup>-1</sup> ) | RA (%) |
|--------|-----------|--------------------------|--------------------------|--------------------------|--------|
| SC     | Fe (II)   | 0.93                     | 2.30                     | 0.89                     | 65.3   |
|        | Fe (III)  | 0.34                     | 0.83                     | 0.74                     | 34.7   |
| SC-T0  | Fe (II)   | 0.91                     | 2.33                     | 0.80                     | 43.0   |
|        | Fe (III)  | 0.29                     | 0.86                     | 0.70                     | 57.0   |

## S2. XPS for SC catalysts

Table S2 Atomic content and O/C atomic ratios of SCs by XPS.

| Element | SC    | SC-T0 | SC-T40 | SC-T80 |
|---------|-------|-------|--------|--------|
| C       | 43.22 | 49.03 | 44.86  | 38.73  |
| O       | 33.43 | 32.48 | 36.11  | 43.66  |
| Si      | 6.35  | 9.17  | 10.1   | 13.63  |
| N       | 3.63  | 4.77  | 4      | 3.98   |
| Al      | 4.26  | 3.49  | 3.61   | -      |
| Fe      | 1.88  | 1.06  | 0.76   | -      |
| Ca      | 3.44  | -     | -      | -      |
| P       | 2.02  | -     | -      | -      |
| Mg      | 1     | -     | 0.55   | -      |
| O/C     | 0.77  | 0.66  | 0.80   | 1.13   |

The element composition determined by XPS was not as accurate as by XRF method, but could provide a way to compare the content of an element in different samples, such as the obvious difference of Fe content in the four samples.

## S3. DMPO trapped EPR spectra

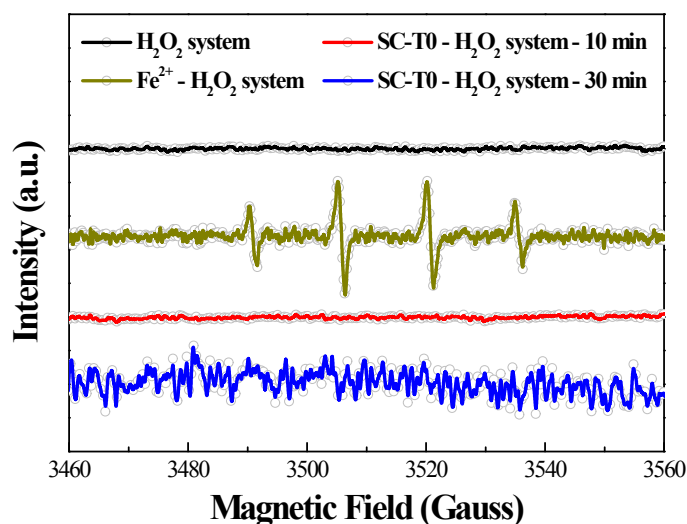

Fig.S1. DMPO trapped EPR spectra.
